# Supplementary material for: Enhanced NO-induced angiogenesisviaNO/H2S co-delivery from self-assembled nanoparticles
Source: Royal Society of Chemistry journal article supplement (doi:10.1039/d1bm00448d), 2021-01-01
Supplement: d1bm00448d1.pdf [file d1bm00448d1.pdf]

## Supplementary information

### Enhanced NO-induced angiogenesis via NO/H<sub>2</sub>S co-delivery from self-assembled nanoparticles

Jieun Lee,<sup>‡a</sup> Chungmo Yang,<sup>‡a</sup> Sangeun Ahn,<sup>a</sup> Yeonjeong Choi,<sup>a</sup> and Kangwon Lee<sup>\*b</sup>

<sup>a</sup> Program in Nanoscience and Technology, Graduate School of Convergence Science and Technology, Seoul National University, Seoul 08826, Republic of Korea

<sup>b</sup> Department of Applied Bioengineering, Graduate School of Convergence Science and Technology, Seoul National University, Seoul, 08826, Republic of Korea

<sup>‡</sup> These authors contributed equally to this study.

\*Corresponding author

Kangwon Lee, Ph.D.

E-mail: kangwonlee@snu.ac.kr

Contact no.s: +82 31 888 9145

|                                | <b>M<sub>n</sub></b> | <b>M<sub>w</sub></b> | <b>PDI</b>  |
|--------------------------------|----------------------|----------------------|-------------|
| <b>mPEG-PLGH</b>               | <b>10186</b>         | <b>12732</b>         | <b>1.25</b> |
| <b>mPEG-PLGH-thiobenzamide</b> | <b>12503</b>         | <b>16114</b>         | <b>1.28</b> |

**Table S1.** Molecular weight of mPEG-PLGH and PTA copolymers. Determined by GPC using DMF as eluent. The data are displayed as the mean ± SEM (n = 5). (M<sub>n</sub>: number average of molecular weight, M<sub>w</sub>: weight average of molecular weight, PDI: polydispersity index; M<sub>w</sub>/M<sub>n</sub>)

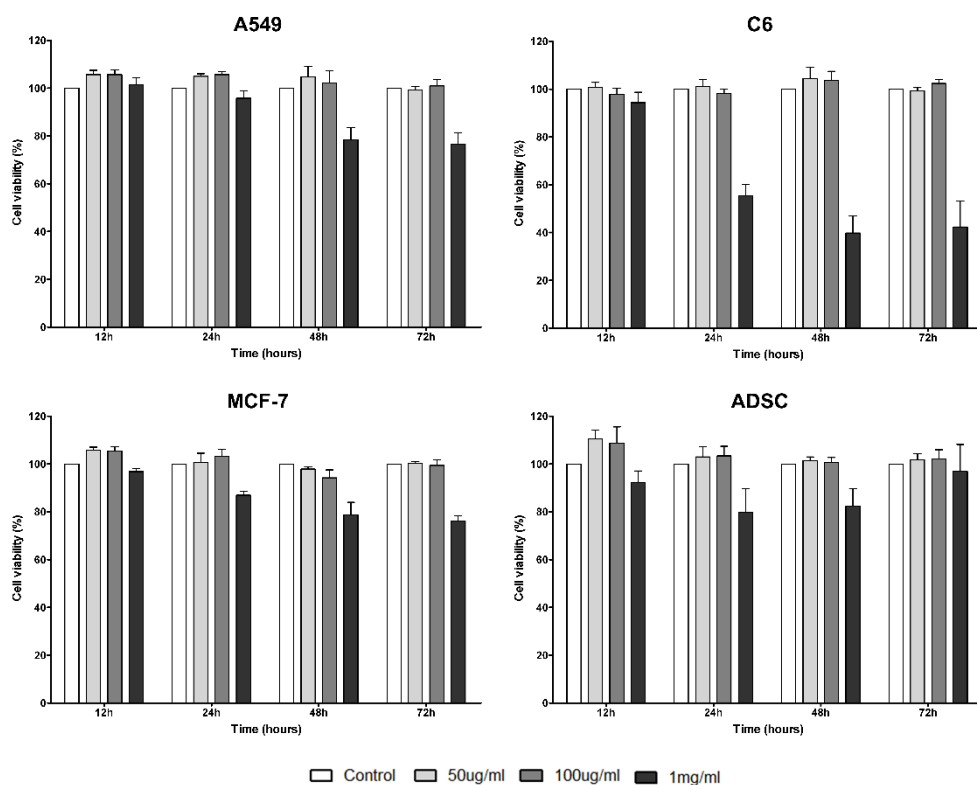

**Figure S1.** *In vitro* cytotoxicity measurement by CCK-8 assay. Cancer cell lines (A549, C6, MCF-7) and ADSCs were tested. The data are displayed as the mean  $\pm$  SEM (n = 4).

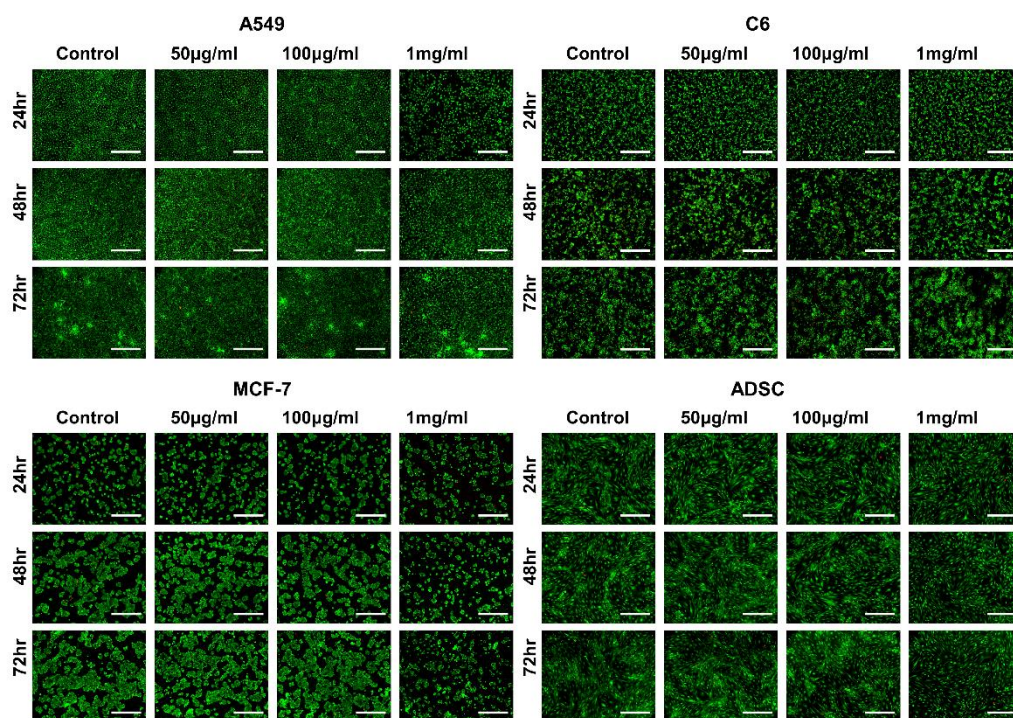

**Figure S2.** Fluorescence images of cells were obtained by Live/Dead assay. Cancer cell lines (A549, C6, MCF-7) and ADSCs were tested. Green channel represents live cells and red channel represents dead cells. (Scale bar = 500µm)
